# Supplementary material for: Unravelling the reaction chemistry and degradation mechanism in aqueous Zn/MnO2 rechargeable batteries
Source: Royal Society of Chemistry journal article supplement (doi:10.1039/c8ta01031e), 2018-01-01
Supplement: c8ta01031e1.pdf [file c8ta01031e1.pdf]

## Supporting information

# Unravelling the reaction chemistry and degradation mechanism in aqueous Zn/MnO<sub>2</sub> rechargeable batteries

*Shuai Zhao<sup>a †</sup>, Bo Han<sup>a †</sup>, Datong Zhang<sup>a</sup>, Qun Huang<sup>a</sup>, Lei Xiao<sup>a</sup>, Libao Chen<sup>a</sup>,*

*Douglas G. Ivey<sup>b</sup>, Yida Deng<sup>c</sup>, Weifeng Wei<sup>a\*</sup>*

<sup>a</sup> State Key Laboratory of Powder Metallurgy, Central South University, Changsha, Hunan 410083, People's Republic of China

<sup>b</sup> Department of Chemical & Materials Engineering, University of Alberta, Edmonton, Alberta, Canada T6G 1H9

<sup>c</sup> School of Materials Science and Engineering, Tianjin University, Jinnan District, Tianjin 300350, People's Republic of China

<sup>†</sup> These authors contributed equally to this work

Corresponding Author

\* [weifengwei@csu.edu.cn](mailto:weifengwei@csu.edu.cn);

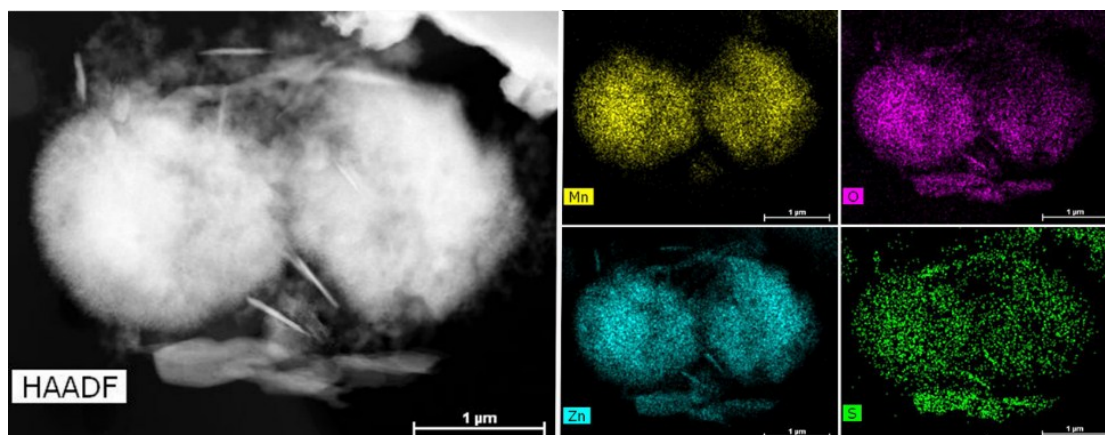

**Figure S1.** HAADF-STEM image and EDX maps of sample at stage *c2*.

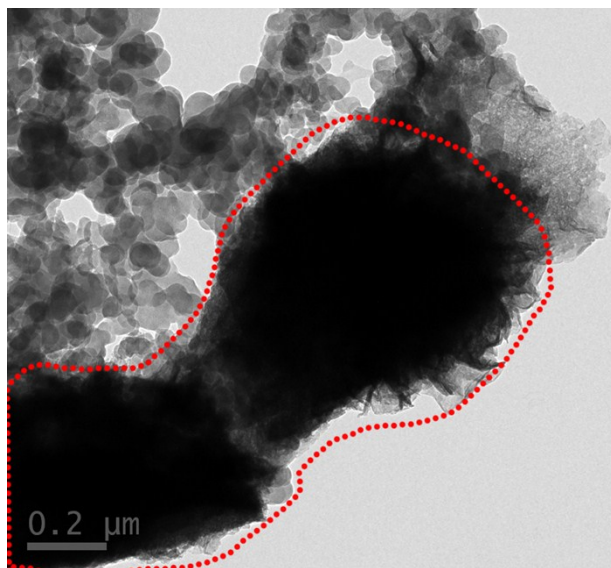

**Figure S2.** TEM BF image of the fully discharged cathode (stage *c7*).

**Table S1.** XPS results for the cathodes under different states of charge (SOCs)

| SOC | Zn 3p               |           | O1s (Mn-O band)     |           | Mn 3s               |           |
|-----|---------------------|-----------|---------------------|-----------|---------------------|-----------|
|     | Binding energy (eV) | FWHM (eV) | Binding energy (eV) | FWHM (eV) | Binding energy (eV) | FWHM (eV) |
| c1  | 89.68               | 3.5       | -                   | -         | -                   | -         |
| c2  | 88.93               | 3.00      | 530.10              | 1.06      | 85.26               | 3.5       |
| c3  | 88.99               | 2.77      | 530.07              | 1.10      | 85.07               | 3.5       |
| c4  | 88.10               | 2.75      | 529.96              | 1.08      | 84.75               | 3.5       |
| c5  | 88.73               | 2.77      | 529.96              | 1.16      | 84.68               | 3.5       |
| c6  | 88.91               | 2.84      | 529.93              | 0.96      | 84.93               | 3.5       |
| c7  | 89.24               | 3.10      | 529.91              | 0.93      | 84.97               | 3.5       |
